# Supplementary material for: Mechanism of Consistent Gyrus Formation: an Experimental and Computational Study
Source: PubMed Central journal article supplement (PMC5112531; doi:10.1038/srep37272), 2016-11-17
Supplement: srep37272-s1.pdf [file srep37272-s1.pdf]

# Mechanism of Consistent Gyrus Formation: an Experimental and Computational Study

Tuo Zhang<sup>1,2\*</sup>, Mir Jalil Razavi<sup>3\*</sup>, Xiao Li<sup>1</sup>, Hanbo Chen<sup>2</sup>, Tianming Liu<sup>2\*\*</sup>, Xianqiao Wang<sup>3\*\*</sup>

<sup>1</sup>Brain Decoding Research Center and School of Automation, Northwestern Polytechnical University, China, 710072; <sup>2</sup>Department of Computer Science and Bioimaging Research Center, The University of Georgia, Athens, GA, 30602; <sup>3</sup>College of Engineering, The University of Georgia, Athens, GA, 30602.

\*These authors contributed equally to this work.

\*\*Joint correspondence authors (Email: tliu@uga.edu and xqwang@uga.edu).

## Supplemental Materials

Table S1 The averaged cortical thickness (mm) of gyri and sulci on subject #1.

| Gyri                    | Thickness | Sulci                     | Thickness |
|-------------------------|-----------|---------------------------|-----------|
| G_cingul-Post-dorsal    | 3.33      | S_calcarine               | 2.22      |
| G_cingul-Post-ventral   | 2.29      | S_central                 | 2.11      |
| G_cuneus                | 2.10      | S_cingul-Marginalis       | 2.57      |
| G_front_inf-Opercular   | 3.23      | S_circular_insula_ant     | 3.43      |
| G_front_inf-Orbital     | 3.21      | S_circular_insula_inf     | 3.20      |
| G_front_inf-Triangul    | 2.98      | S_circular_insula_sup     | 3.11      |
| G_front_middle          | 2.93      | S_collat_transv_ant       | 3.09      |
| G_front_sup             | 3.18      | S_collat_transv_post      | 2.40      |
| G_Ins_lg_and_S_cent_ins | 3.36      | S_front_inf               | 2.69      |
| G_insular_short         | 3.67      | S_front_middle            | 2.66      |
| G_occipital_middle      | 2.83      | S_front_sup               | 2.71      |
| G_occipital_sup         | 2.30      | S_interm_prim-Jensen      | 2.55      |
| G_oc-temp_lat-fusifor   | 3.22      | S_intrapariet_and_P_trans | 2.37      |
| G_oc-temp_med-Lingual   | 2.18      | S_oc_middle_and_Lunatus   | 2.24      |
| G_oc-temp_med-Parahip   | 3.20      | S_oc_sup_and_transversal  | 2.35      |
| G_orbital               | 3.22      | S_occipital_ant           | 2.54      |
| G_pariet_inf-Angular    | 2.91      | S_oc-temp_lat             | 2.87      |
| G_pariet_inf-Supramar   | 2.95      | S_oc-temp_med_and_Lingual | 2.61      |
| G_parietal_sup          | 2.39      | S_orbital_lateral         | 2.72      |
| G_postcentral           | 2.30      | S_orbital_med-olfact      | 2.70      |
| G_precentral            | 2.93      | S_orbital-H_Shaped        | 3.09      |
| G_precuneus             | 2.83      | S_parieto_occipital       | 2.49      |
| G_rectus                | 2.99      | S_pericallosal            | 2.08      |
| G_subcallosal           | 2.73      | S_postcentral             | 2.38      |
| G_temp_sup-G_T_transv   | 2.86      | S_precentral-inf-part     | 2.78      |
| G_temp_sup-Lateral      | 3.42      | S_precentral-sup-part     | 2.64      |

|                       |           |                       |           |
|-----------------------|-----------|-----------------------|-----------|
| G_temp_sup-Plan_polar | 3.64      | S_suborbital          | 3.16      |
| G_temp_sup-Plan_tempo | 2.89      | S_subparietal         | 2.68      |
| G_temporal_inf        | 3.40      | S_temporal_inf        | 2.79      |
| G_temporal_middle     | 3.41      | S_temporal_sup        | 2.85      |
|                       |           | S_temporal_transverse | 2.59      |
| Avg.                  | 2.95±0.85 |                       | 2.67±0.76 |

Table S2 The averaged cortical thickness (mm) of gyri and sulci on subject #2.

| <b>Gyri</b>             | <b>Thickness</b> | <b>Sulci</b>              | <b>Thickness</b> |
|-------------------------|------------------|---------------------------|------------------|
| G_cingul-Post-dorsal    | 2.96             | S_calcarine               | 2.12             |
| G_cingul-Post-ventral   | 2.29             | S_central                 | 2.01             |
| G_cuneus                | 2.13             | S_cingul-Marginalis       | 2.48             |
| G_front_inf-Opercular   | 3.15             | S_circular_insula_ant     | 3.06             |
| G_front_inf-Orbital     | 2.87             | S_circular_insula_inf     | 2.88             |
| G_front_inf-Triangul    | 2.96             | S_circular_insula_sup     | 2.87             |
| G_front_middle          | 2.94             | S_collat_transv_ant       | 2.85             |
| G_front_sup             | 3.08             | S_collat_transv_post      | 2.46             |
| G_Ins_lg_and_S_cent_ins | 3.13             | S_front_inf               | 2.63             |
| G_insular_short         | 3.61             | S_front_middle            | 2.73             |
| G_occipital_middle      | 2.94             | S_front_sup               | 2.77             |
| G_occipital_sup         | 2.50             | S_interm_prim-Jensen      | 2.77             |
| G_oc-temp_lat-fusifor   | 3.15             | S_intrapariet_and_P_trans | 2.60             |
| G_oc-temp_med-Lingual   | 2.00             | S_oc_middle_and_Lunatus   | 2.45             |
| G_oc-temp_med-Parahip   | 2.96             | S_oc_sup_and_transversal  | 2.51             |
| G_orbital               | 2.93             | S_occipital_ant           | 2.61             |
| G_pariet_inf-Angular    | 3.05             | S_oc-temp_lat             | 2.81             |
| G_pariet_inf-Supramar   | 2.92             | S_oc-temp_med_and_Lingual | 2.52             |
| G_parietal_sup          | 2.66             | S_orbital_lateral         | 2.66             |
| G_postcentral           | 2.48             | S_orbital_med-olfact      | 2.48             |
| G_precentral            | 3.03             | S_orbital-H_Shaped        | 2.98             |
| G_precuneus             | 2.95             | S_parieto_occipital       | 2.58             |
| G_rectus                | 2.66             | S_pericallosal            | 1.66             |
| G_subcallosal           | 2.80             | S_postcentral             | 2.33             |
| G_temp_sup-G_T_transv   | 2.95             | S_precentral-inf-part     | 2.61             |
| G_temp_sup-Lateral      | 3.27             | S_precentral-sup-part     | 2.68             |
| G_temp_sup-Plan_polar   | 3.32             | S_suborbital              | 3.03             |
| G_temp_sup-Plan_tempo   | 2.91             | S_subparietal             | 2.74             |
| G_temporal_inf          | 3.29             | S_temporal_inf            | 2.90             |
| G_temporal_middle       | 3.21             | S_temporal_sup            | 2.86             |
|                         |                  | S_temporal_transverse     | 2.80             |
| Avg.                    | 2.89±0.89        |                           | 2.63±0.97        |

Table S3 The averaged cortical thickness (mm) of gyri and sulci on subject #3.

| <b>Gyri</b>             | <b>Thickness</b> | <b>Sulci</b>              | <b>Thickness</b> |
|-------------------------|------------------|---------------------------|------------------|
| G_cingul-Post-dorsal    | 3.34             | S_calcarine               | 2.29             |
| G_cingul-Post-ventral   | 2.66             | S_central                 | 2.27             |
| G_cuneus                | 2.14             | S_cingul-Marginalis       | 2.62             |
| G_front_inf-Opercular   | 3.18             | S_circular_insula_ant     | 3.31             |
| G_front_inf-Orbital     | 3.05             | S_circular_insula_inf     | 2.83             |
| G_front_inf-Triangul    | 2.94             | S_circular_insula_sup     | 3.00             |
| G_front_middle          | 3.06             | S_collat_transv_ant       | 2.97             |
| G_front_sup             | 3.16             | S_collat_transv_post      | 2.49             |
| G_Ins_lg_and_S_cent_ins | 3.44             | S_front_inf               | 2.71             |
| G_insular_short         | 3.99             | S_front_middle            | 2.60             |
| G_occipital_middle      | 3.12             | S_front_sup               | 2.89             |
| G_occipital_sup         | 2.60             | S_interm_prim-Jensen      | 2.76             |
| G_oc-temp_lat-fusifor   | 3.31             | S_intrapariet_and_P_trans | 2.71             |
| G_oc-temp_med-Lingual   | 2.26             | S_oc_middle_and_Lunatus   | 2.53             |
| G_oc-temp_med-Parahip   | 3.54             | S_oc_sup_and_transversal  | 2.67             |
| G_orbital               | 3.19             | S_occipital_ant           | 2.70             |
| G_pariet_inf-Angular    | 3.18             | S_oc-temp_lat             | 2.83             |
| G_pariet_inf-Supramar   | 3.14             | S_oc-temp_med_and_Lingual | 2.83             |
| G_parietal_sup          | 2.68             | S_orbital_lateral         | 2.75             |
| G_postcentral           | 2.54             | S_orbital_med-olfact      | 2.76             |
| G_precentral            | 3.07             | S_orbital-H_Shaped        | 3.11             |
| G_precuneus             | 2.96             | S_parieto_occipital       | 2.60             |
| G_rectus                | 2.87             | S_pericallosal            | 1.90             |
| G_subcallosal           | 2.79             | S_postcentral             | 2.70             |
| G_temp_sup-G_T_transv   | 2.82             | S_precentral-inf-part     | 2.79             |
| G_temp_sup-Lateral      | 3.47             | S_precentral-sup-part     | 2.71             |
| G_temp_sup-Plan_polar   | 3.43             | S_suborbital              | 2.81             |
| G_temp_sup-Plan_tempo   | 2.99             | S_subparietal             | 3.21             |
| G_temporal_inf          | 3.38             | S_temporal_inf            | 3.08             |
| G_temporal_middle       | 3.43             | S_temporal_sup            | 2.91             |
|                         |                  | S_temporal_transverse     | 3.01             |
| Avg.                    | 3.04±0.94        |                           | 2.75±0.58        |

Table S4 The averaged cortical thickness (mm) of gyri and sulci on subject #4.

| <b>Gyri</b>           | <b>Thickness</b> | <b>Sulci</b>          | <b>Thickness</b> |
|-----------------------|------------------|-----------------------|------------------|
| G_cingul-Post-dorsal  | 3.10             | S_calcarine           | 2.13             |
| G_cingul-Post-ventral | 2.22             | S_central             | 1.86             |
| G_cuneus              | 2.04             | S_cingul-Marginalis   | 2.30             |
| G_front_inf-Opercular | 2.82             | S_circular_insula_ant | 2.78             |
| G_front_inf-Orbital   | 2.82             | S_circular_insula_inf | 2.53             |
| G_front_inf-Triangul  | 2.66             | S_circular_insula_sup | 2.66             |

|                         |           |                           |           |
|-------------------------|-----------|---------------------------|-----------|
| G_front_middle          | 2.73      | S_collat_transv_ant       | 2.63      |
| G_front_sup             | 2.84      | S_collat_transv_post      | 2.19      |
| G_Ins_lg_and_S_cent_ins | 3.21      | S_front_inf               | 2.49      |
| G_insular_short         | 3.75      | S_front_middle            | 2.37      |
| G_occipital_middle      | 2.63      | S_front_sup               | 2.40      |
| G_occipital_sup         | 2.31      | S_interm_prim-Jensen      | 2.19      |
| G_oc-temp_lat-fusifor   | 3.09      | S_intrapariet_and_P_trans | 2.24      |
| G_oc-temp_med-Lingual   | 2.09      | S_oc_middle_and_Lunatus   | 2.08      |
| G_oc-temp_med-Parahip   | 3.12      | S_oc_sup_and_transversal  | 2.23      |
| G_orbital               | 2.71      | S_occipital_ant           | 2.39      |
| G_pariet_inf-Angular    | 2.67      | S_oc-temp_lat             | 2.63      |
| G_pariet_inf-Supramar   | 2.73      | S_oc-temp_med_and_Lingual | 2.40      |
| G_parietal_sup          | 2.33      | S_orbital_lateral         | 2.20      |
| G_postcentral           | 2.20      | S_orbital_med-olfact      | 2.42      |
| G_precentral            | 2.72      | S_orbital-H_Shaped        | 2.61      |
| G_precuneus             | 2.61      | S_parieto_occipital       | 2.20      |
| G_rectus                | 2.64      | S_pericallosal            | 1.98      |
| G_subcallosal           | 2.82      | S_postcentral             | 2.07      |
| G_temp_sup-G_T_transv   | 2.73      | S_precentral-inf-part     | 2.51      |
| G_temp_sup-Lateral      | 3.13      | S_precentral-sup-part     | 2.30      |
| G_temp_sup-Plan_polar   | 3.29      | S_suborbital              | 2.48      |
| G_temp_sup-Plan_tempo   | 2.75      | S_subparietal             | 2.46      |
| G_temporal_inf          | 3.14      | S_temporal_inf            | 2.69      |
| G_temporal_middle       | 3.03      | S_temporal_sup            | 2.57      |
|                         |           | S_temporal_transverse     | 2.90      |
| Avg.                    | 2.76±0.99 |                           | 2.38±0.52 |

Table S5 The averaged cortical thickness (mm) of gyri and sulci on subject #5.

| Gyri                    | Thickness | Sulci                     | Thickness |
|-------------------------|-----------|---------------------------|-----------|
| G_cingul-Post-dorsal    | 2.96      | S_calcarine               | 2.12      |
| G_cingul-Post-ventral   | 2.49      | S_central                 | 2.03      |
| G_cuneus                | 2.15      | S_cingul-Marginalis       | 2.43      |
| G_front_inf-Opercular   | 3.20      | S_circular_insula_ant     | 2.97      |
| G_front_inf-Orbital     | 2.89      | S_circular_insula_inf     | 2.93      |
| G_front_inf-Triangul    | 3.00      | S_circular_insula_sup     | 3.00      |
| G_front_middle          | 2.88      | S_collat_transv_ant       | 2.74      |
| G_front_sup             | 3.07      | S_collat_transv_post      | 2.21      |
| G_Ins_lg_and_S_cent_ins | 3.65      | S_front_inf               | 2.50      |
| G_insular_short         | 3.97      | S_front_middle            | 2.53      |
| G_occipital_middle      | 2.75      | S_front_sup               | 2.72      |
| G_occipital_sup         | 2.37      | S_interm_prim-Jensen      | 2.50      |
| G_oc-temp_lat-fusifor   | 3.00      | S_intrapariet_and_P_trans | 2.31      |
| G_oc-temp_med-Lingual   | 2.21      | S_oc_middle_and_Lunatus   | 2.15      |
| G_oc-temp_med-Parahip   | 3.33      | S_oc_sup_and_transversal  | 2.37      |

|                       |           |                           |           |
|-----------------------|-----------|---------------------------|-----------|
| G_orbital             | 2.95      | S_occipital_ant           | 2.60      |
| G_pariet_inf-Angular  | 2.82      | S_oc-temp_lat             | 2.77      |
| G_pariet_inf-Supramar | 2.79      | S_oc-temp_med_and_Lingual | 2.34      |
| G_parietal_sup        | 2.55      | S_orbital_lateral         | 2.40      |
| G_postcentral         | 2.35      | S_orbital_med-olfact      | 2.32      |
| G_precentral          | 2.95      | S_orbital-H_Shaped        | 2.71      |
| G_precuneus           | 2.94      | S_parieto_occipital       | 2.38      |
| G_rectus              | 2.61      | S_pericallosal            | 2.14      |
| G_subcallosal         | 2.25      | S_postcentral             | 2.31      |
| G_temp_sup-G_T_transv | 2.55      | S_precentral-inf-part     | 2.75      |
| G_temp_sup-Lateral    | 3.32      | S_precentral-sup-part     | 2.63      |
| G_temp_sup-Plan_polar | 3.74      | S_suborbital              | 2.81      |
| G_temp_sup-Plan_tempo | 2.57      | S_subparietal             | 2.71      |
| G_temporal_inf        | 3.22      | S_temporal_inf            | 2.84      |
| G_temporal_middle     | 3.24      | S_temporal_sup            | 2.78      |
|                       |           | S_temporal_transverse     | 2.34      |
| Avg.                  | 2.88±1.09 |                           | 2.53±0.49 |

Table S6 The averaged cortical thickness (mm) of gyri and sulci on subject #6.

| Gyri                    | Thickness | Sulci                     | Thickness |
|-------------------------|-----------|---------------------------|-----------|
| G_cingul-Post-dorsal    | 3.08      | S_calcarine               | 2.25      |
| G_cingul-Post-ventral   | 2.18      | S_central                 | 2.05      |
| G_cuneus                | 2.09      | S_cingul-Marginalis       | 2.38      |
| G_front_inf-Opercular   | 3.13      | S_circular_insula_ant     | 3.50      |
| G_front_inf-Orbital     | 3.35      | S_circular_insula_inf     | 2.63      |
| G_front_inf-Triangul    | 2.95      | S_circular_insula_sup     | 2.94      |
| G_front_middle          | 2.85      | S_collat_transv_ant       | 2.84      |
| G_front_sup             | 3.01      | S_collat_transv_post      | 2.37      |
| G_ins_lg_and_S_cent_ins | 3.32      | S_front_inf               | 2.67      |
| G_insular_short         | 3.79      | S_front_middle            | 2.60      |
| G_occipital_middle      | 2.78      | S_front_sup               | 2.70      |
| G_occipital_sup         | 2.29      | S_interm_prim-Jensen      | 2.46      |
| G_oc-temp_lat-fusifor   | 3.23      | S_intrapariet_and_P_trans | 2.33      |
| G_oc-temp_med-Lingual   | 2.39      | S_oc_middle_and_Lunatus   | 2.22      |
| G_oc-temp_med-Parahip   | 3.40      | S_oc_sup_and_transversal  | 2.31      |
| G_orbital               | 2.93      | S_occipital_ant           | 2.72      |
| G_pariet_inf-Angular    | 2.81      | S_oc-temp_lat             | 2.82      |
| G_pariet_inf-Supramar   | 2.87      | S_oc-temp_med_and_Lingual | 2.79      |
| G_parietal_sup          | 2.39      | S_orbital_lateral         | 2.59      |
| G_postcentral           | 2.37      | S_orbital_med-olfact      | 2.66      |
| G_precentral            | 2.78      | S_orbital-H_Shaped        | 2.78      |
| G_precuneus             | 2.72      | S_parieto_occipital       | 2.48      |
| G_rectus                | 2.71      | S_pericallosal            | 1.55      |
| G_subcallosal           | 2.75      | S_postcentral             | 2.27      |

|                       |           |                       |           |
|-----------------------|-----------|-----------------------|-----------|
| G_temp_sup-G_T_transv | 2.83      | S_precentral-inf-part | 2.63      |
| G_temp_sup-Lateral    | 3.23      | S_precentral-sup-part | 2.52      |
| G_temp_sup-Plan_polar | 3.40      | S_suborbital          | 2.82      |
| G_temp_sup-Plan_tempo | 2.75      | S_subparietal         | 2.50      |
| G_temporal_inf        | 3.12      | S_temporal_inf        | 2.85      |
| G_temporal_middle     | 3.24      | S_temporal_sup        | 2.76      |
|                       |           | S_temporal_transverse | 2.68      |
| Avg.                  | 2.88±0.91 |                       | 2.57±1.02 |

Table S7 The averaged cortical thickness (mm) of gyri and sulci on subject #7.

| <b>Gyri</b>             | <b>Thickness</b> | <b>Sulci</b>              | <b>Thickness</b> |
|-------------------------|------------------|---------------------------|------------------|
| G_cingul-Post-dorsal    | 3.22             | S_calcarine               | 2.29             |
| G_cingul-Post-ventral   | 2.25             | S_central                 | 2.21             |
| G_cuneus                | 2.19             | S_cingul-Marginalis       | 2.57             |
| G_front_inf-Opercular   | 3.17             | S_circular_insula_ant     | 3.10             |
| G_front_inf-Orbital     | 3.29             | S_circular_insula_inf     | 2.95             |
| G_front_inf-Triangul    | 2.98             | S_circular_insula_sup     | 3.01             |
| G_front_middle          | 2.98             | S_collat_transv_ant       | 2.90             |
| G_front_sup             | 3.11             | S_collat_transv_post      | 2.34             |
| G_Ins_lg_and_S_cent_ins | 3.52             | S_front_inf               | 2.63             |
| G_insular_short         | 4.04             | S_front_middle            | 2.70             |
| G_occipital_middle      | 3.02             | S_front_sup               | 2.79             |
| G_occipital_sup         | 2.65             | S_interm_prim-Jensen      | 2.90             |
| G_oc-temp_lat-fusifor   | 3.13             | S_intrapariet_and_P_trans | 2.49             |
| G_oc-temp_med-Lingual   | 2.29             | S_oc_middle_and_Lunatus   | 2.49             |
| G_oc-temp_med-Parahip   | 3.20             | S_oc_sup_and_transversal  | 2.52             |
| G_orbital               | 3.05             | S_occipital_ant           | 2.70             |
| G_pariet_inf-Angular    | 3.13             | S_oc-temp_lat             | 2.91             |
| G_pariet_inf-Supramar   | 3.16             | S_oc-temp_med_and_Lingual | 2.70             |
| G_parietal_sup          | 2.77             | S_orbital_lateral         | 2.32             |
| G_postcentral           | 2.55             | S_orbital_med-olfact      | 2.39             |
| G_precentral            | 3.08             | S_orbital-H_Shaped        | 2.99             |
| G_precuneus             | 2.92             | S_parieto_occipital       | 2.52             |
| G_rectus                | 2.73             | S_pericallosal            | 1.84             |
| G_subcallosal           | 3.14             | S_postcentral             | 2.55             |
| G_temp_sup-G_T_transv   | 2.97             | S_precentral-inf-part     | 2.75             |
| G_temp_sup-Lateral      | 3.39             | S_precentral-sup-part     | 2.77             |
| G_temp_sup-Plan_polar   | 3.54             | S_suborbital              | 2.89             |
| G_temp_sup-Plan_tempo   | 2.80             | S_subparietal             | 2.72             |
| G_temporal_inf          | 3.29             | S_temporal_inf            | 2.87             |
| G_temporal_middle       | 3.38             | S_temporal_sup            | 2.89             |
|                         |                  | S_temporal_transverse     | 2.95             |
| Avg.                    | 3.02±1.02        |                           | 2.67±0.82        |

Table S8 The averaged cortical thickness (mm) of gyri and sulci on subject #8.

| <b>Gyri</b>             | <b>Thickness</b> | <b>Sulci</b>              | <b>Thickness</b> |
|-------------------------|------------------|---------------------------|------------------|
| G_cingul-Post-dorsal    | 3.16             | S_calcarine               | 2.15             |
| G_cingul-Post-ventral   | 2.62             | S_central                 | 2.16             |
| G_cuneus                | 2.02             | S_cingul-Marginalis       | 2.51             |
| G_front_inf-Opercular   | 3.03             | S_circular_insula_ant     | 3.23             |
| G_front_inf-Orbital     | 3.10             | S_circular_insula_inf     | 2.78             |
| G_front_inf-Triangular  | 2.89             | S_circular_insula_sup     | 2.84             |
| G_front_middle          | 2.85             | S_collat_transv_ant       | 2.83             |
| G_front_sup             | 3.09             | S_collat_transv_post      | 2.33             |
| G_Ins_lg_and_S_cent_ins | 3.19             | S_front_inf               | 2.47             |
| G_insular_short         | 3.48             | S_front_middle            | 2.45             |
| G_occipital_middle      | 2.86             | S_front_sup               | 2.82             |
| G_occipital_sup         | 2.47             | S_interm_prim-Jensen      | 2.68             |
| G_oc-temp_lat-fusifor   | 3.04             | S_intrapariet_and_P_trans | 2.54             |
| G_oc-temp_med-Lingual   | 2.12             | S_oc_middle_and_Lunatus   | 2.43             |
| G_oc-temp_med-Parahip   | 2.91             | S_oc_sup_and_transversal  | 2.30             |
| G_orbital               | 2.91             | S_occipital_ant           | 2.72             |
| G_pariet_inf-Angular    | 3.08             | S_oc-temp_lat             | 2.74             |
| G_pariet_inf-Supramar   | 2.99             | S_oc-temp_med_and_Lingual | 2.60             |
| G_parietal_sup          | 2.59             | S_orbital_lateral         | 2.16             |
| G_postcentral           | 2.49             | S_orbital_med-olfact      | 2.33             |
| G_precentral            | 3.06             | S_orbital-H_Shaped        | 2.70             |
| G_precuneus             | 2.82             | S_parieto_occipital       | 2.36             |
| G_rectus                | 2.74             | S_pericallosal            | 1.75             |
| G_subcallosal           | 3.07             | S_postcentral             | 2.48             |
| G_temp_sup-G_T_transv   | 2.90             | S_precentral-inf-part     | 2.67             |
| G_temp_sup-Lateral      | 3.25             | S_precentral-sup-part     | 2.68             |
| G_temp_sup-Plan_polar   | 3.46             | S_suborbital              | 2.92             |
| G_temp_sup-Plan_tempo   | 2.73             | S_subparietal             | 2.62             |
| G_temporal_inf          | 3.07             | S_temporal_inf            | 2.87             |
| G_temporal_middle       | 3.36             | S_temporal_sup            | 2.80             |
|                         |                  | S_temporal_transverse     | 2.58             |
| Avg.                    | 2.90±0.88        |                           | 2.56±0.82        |

Table S9 The averaged cortical thickness (mm) of gyri and sulci on subject #9.

| <b>Gyri</b>           | <b>Thickness</b> | <b>Sulci</b>          | <b>Thickness</b> |
|-----------------------|------------------|-----------------------|------------------|
| G_cingul-Post-dorsal  | 3.18             | S_calcarine           | 2.16             |
| G_cingul-Post-ventral | 2.36             | S_central             | 2.07             |
| G_cuneus              | 2.20             | S_cingul-Marginalis   | 2.40             |
| G_front_inf-Opercular | 2.98             | S_circular_insula_ant | 3.06             |
| G_front_inf-Orbital   | 3.14             | S_circular_insula_inf | 2.60             |

|                         |           |                           |           |
|-------------------------|-----------|---------------------------|-----------|
| G_front_inf-Triangul    | 2.82      | S_circular_insula_sup     | 2.81      |
| G_front_middle          | 2.93      | S_collat_transv_ant       | 2.90      |
| G_front_sup             | 3.09      | S_collat_transv_post      | 2.26      |
| G_Ins_lg_and_S_cent_ins | 3.30      | S_front_inf               | 2.64      |
| G_insular_short         | 3.51      | S_front_middle            | 2.56      |
| G_occipital_middle      | 2.78      | S_front_sup               | 2.72      |
| G_occipital_sup         | 2.39      | S_interprim-Jensen        | 2.62      |
| G_oc-temp_lat-fusifor   | 3.24      | S_intrapariet_and_P_trans | 2.40      |
| G_oc-temp_med-Lingual   | 2.41      | S_oc_middle_and_Lunatus   | 2.40      |
| G_oc-temp_med-Parahip   | 3.08      | S_oc_sup_and_transversal  | 2.36      |
| G_orbital               | 2.92      | S_occipital_ant           | 2.75      |
| G_pariet_inf-Angular    | 2.95      | S_oc-temp_lat             | 2.74      |
| G_pariet_inf-Supramar   | 2.93      | S_oc-temp_med_and_Lingual | 2.57      |
| G_parietal_sup          | 2.57      | S_orbital_lateral         | 2.55      |
| G_postcentral           | 2.35      | S_orbital_med-olfact      | 2.38      |
| G_precentral            | 3.00      | S_orbital-H_Shaped        | 2.89      |
| G_precuneus             | 2.82      | S_parieto_occipital       | 2.38      |
| G_rectus                | 2.86      | S_pericallosal            | 1.65      |
| G_subcallosal           | 2.61      | S_postcentral             | 2.31      |
| G_temp_sup-G_T_transv   | 2.95      | S_precentral-inf-part     | 2.71      |
| G_temp_sup-Lateral      | 3.11      | S_precentral-sup-part     | 2.55      |
| G_temp_sup-Plan_polar   | 3.12      | S_suborbital              | 2.60      |
| G_temp_sup-Plan_tempo   | 2.89      | S_subparietal             | 2.53      |
| G_temporal_inf          | 3.02      | S_temporal_inf            | 2.65      |
| G_temporal_middle       | 3.15      | S_temporal_sup            | 2.63      |
|                         |           | S_temporal_transverse     | 2.88      |
| Avg.                    | 2.88±0.68 |                           | 2.54±0.89 |

Table S10 The averaged cortical thickness (mm) of gyri and sulci on subject #10.

| <b>Gyri</b>             | <b>Thickness</b> | <b>Sulci</b>              | <b>Thickness</b> |
|-------------------------|------------------|---------------------------|------------------|
| G_cingul-Post-dorsal    | 3.06             | S_calcarine               | 2.13             |
| G_cingul-Post-ventral   | 2.21             | S_central                 | 2.13             |
| G_cuneus                | 2.45             | S_cingul-Marginalis       | 2.53             |
| G_front_inf-Opercular   | 2.96             | S_circular_insula_ant     | 3.27             |
| G_front_inf-Orbital     | 3.07             | S_circular_insula_inf     | 2.67             |
| G_front_inf-Triangul    | 2.98             | S_circular_insula_sup     | 2.91             |
| G_front_middle          | 2.85             | S_collat_transv_ant       | 3.08             |
| G_front_sup             | 3.17             | S_collat_transv_post      | 2.30             |
| G_Ins_lg_and_S_cent_ins | 2.96             | S_front_inf               | 2.67             |
| G_insular_short         | 3.52             | S_front_middle            | 2.54             |
| G_occipital_middle      | 2.95             | S_front_sup               | 2.74             |
| G_occipital_sup         | 2.58             | S_interprim-Jensen        | 2.71             |
| G_oc-temp_lat-fusifor   | 3.03             | S_intrapariet_and_P_trans | 2.56             |
| G_oc-temp_med-Lingual   | 2.32             | S_oc_middle_and_Lunatus   | 2.42             |



|                       |           |                           |           |
|-----------------------|-----------|---------------------------|-----------|
| G_oc-temp_med-Parahip | 3.11      | S_oc_sup_and_transversal  | 2.47      |
| G_orbital             | 2.92      | S_occipital_ant           | 2.53      |
| G_pariet_inf-Angular  | 3.10      | S_oc-temp_lat             | 2.78      |
| G_pariet_inf-Supramar | 3.10      | S_oc-temp_med_and_Lingual | 2.69      |
| G_parietal_sup        | 2.63      | S_orbital_lateral         | 2.69      |
| G_postcentral         | 2.55      | S_orbital_med-olfact      | 2.47      |
| G_precentral          | 3.10      | S_orbital-H_Shaped        | 2.69      |
| G_precuneus           | 2.89      | S_parieto_occipital       | 2.51      |
| G_rectus              | 2.64      | S_pericallosal            | 1.69      |
| G_subcallosal         | 2.87      | S_postcentral             | 2.53      |
| G_temp_sup-G_T_transv | 2.83      | S_precentral-inf-part     | 2.74      |
| G_temp_sup-Lateral    | 3.15      | S_precentral-sup-part     | 2.67      |
| G_temp_sup-Plan_polar | 3.03      | S_suborbital              | 2.83      |
| G_temp_sup-Plan_tempo | 3.02      | S_subparietal             | 2.64      |
| G_temporal_inf        | 3.05      | S_temporal_inf            | 2.70      |
| G_temporal_middle     | 3.21      | S_temporal_sup            | 2.73      |
|                       |           | S_temporal_transverse     | 2.80      |
| Avg.                  | 2.90±0.69 |                           | 2.61±0.61 |

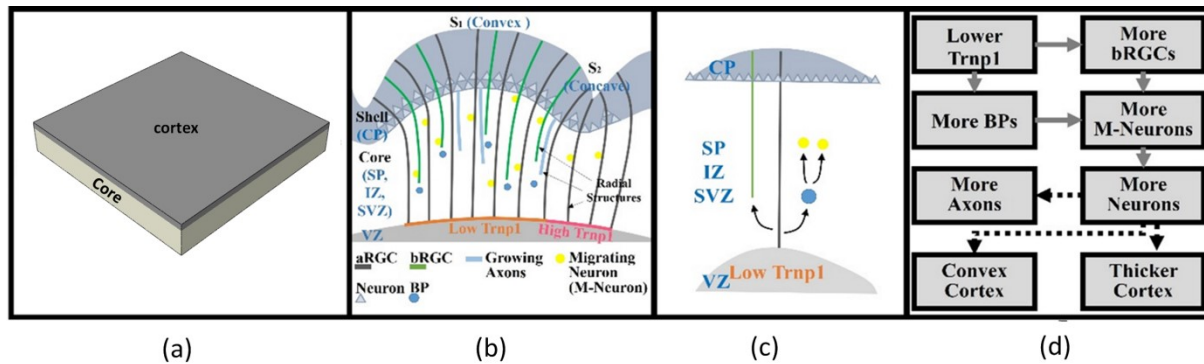

Figure S1. (a) An idealized 3D model for a small piece of the brain; (b) and (c) biological viewpoints of neurogenesis; (d) flow chart of how Trnp1 regulates the cortical folding patterns. The dashed line arrows suggest the postulated gyrification process at the macro-scale. Abbreviations: RGC, radial glial cell; aRGC, apical RGC; bRGC, basal RGC; BP, basal progenitor; CP, cortical plate; VZ, ventricular zone; SVZ, subventricular zone; SP, subplate; IZ, intermediate zone.

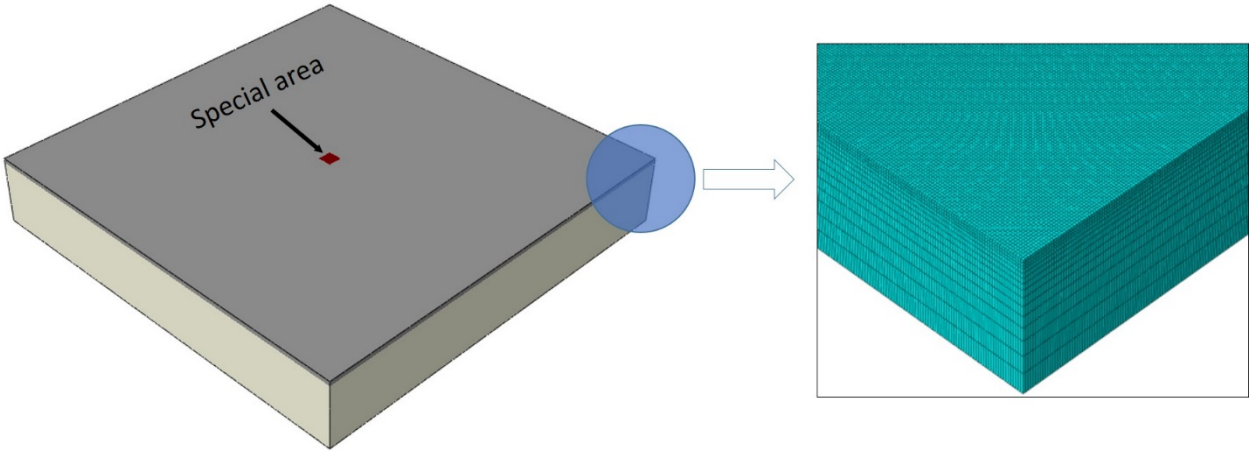

Figure S2. A 3D planar double-layered brain model with a fine mesh in the top cortex layer.
